# Supplementary material
Source: Springer Nature journal article supplement (https://www.springermedizin.de/resource/supplementary/13643_2012_50_MOESM16_ESM.pdf/9681370)
Supplement: MOESM16 [file 9681370]

**Adaptation Activity-**  
delivering the intervention through immigrant community settings or structures

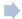

**Mechanism-**  
theorised as *'embeddedness'*

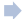

**Response-**  
immigrants encounter intervention in familiar and local settings—  
'shared place'

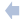

**Resistance** —  
marginalising for immigrants do not belong or have chosen to withdraw from co-ethnic networks

**Context**—contingent on immigrant target population being ethnically stratified
